# Supplementary material
Source: PubMed Central journal article supplement (PMC3927142)
Supplement: NIHMS357730-supplement-Supplemental_table.pdf [file NIHMS357730-supplement-Supplemental_table.pdf]

|   | Non-Conserved |      |      | A24  |      |      | P25  |      |      | V29  |      |      |
|---|---------------|------|------|------|------|------|------|------|------|------|------|------|
|   | 1st           | 2nd  | 3rd  | 1st  | 2nd  | 3rd  | 1st  | 2nd  | 3rd  | 1st  | 2nd  | 3rd  |
| A | 0.15          | 0.45 | 0.00 | 0.15 | 0.45 | 0.00 | 0.05 | 0.20 | 0.00 | 0.00 | 0.00 | 0.00 |
| C | 0.15          | 0.15 | 0.45 | 0.15 | 0.30 | 0.45 | 0.65 | 0.65 | 0.45 | 0.00 | 0.50 | 0.00 |
| G | 0.25          | 0.25 | 0.10 | 0.25 | 0.15 | 0.10 | 0.05 | 0.05 | 0.10 | 0.50 | 0.00 | 1.00 |
| T | 0.45          | 0.15 | 0.45 | 0.45 | 0.10 | 0.45 | 0.25 | 0.10 | 0.45 | 0.50 | 0.50 | 0.00 |

| Y31  |      |      | G52  |      |      | S53 / S55 |      |      | K54  |      |      |      |
|------|------|------|------|------|------|-----------|------|------|------|------|------|------|
| 1st  | 2nd  | 3rd  | 1st  | 2nd  | 3rd  | 1st       | 2nd  | 3rd  | 1st  | 2nd  | 3rd  | 1st  |
| 0.00 | 0.50 | 0.00 | 0.10 | 0.10 | 0.00 | 0.10      | 0.10 | 0.00 | 0.25 | 0.25 | 0.00 | 0.70 |
| 0.00 | 0.50 | 0.00 | 0.10 | 0.10 | 0.33 | 0.10      | 0.70 | 0.33 | 0.25 | 0.25 | 0.33 | 0.10 |
| 0.00 | 0.00 | 0.00 | 0.70 | 0.70 | 0.33 | 0.10      | 0.10 | 0.33 | 0.25 | 0.25 | 0.33 | 0.10 |
| 1.00 | 0.00 | 1.00 | 0.10 | 0.10 | 0.33 | 0.70      | 0.10 | 0.33 | 0.25 | 0.25 | 0.33 | 0.10 |

| T56  |      | G77 / G79 |      |      |
|------|------|-----------|------|------|
| 2nd  | 3rd  | 1st       | 2nd  | 3rd  |
| 0.10 | 0.00 | 0.15      | 0.40 | 0.00 |
| 0.70 | 0.33 | 0.10      | 0.10 | 0.45 |
| 0.10 | 0.33 | 0.35      | 0.35 | 0.10 |
| 0.10 | 0.33 | 0.40      | 0.15 | 0.45 |
